# Supplementary material for: A two-step method to synthesize water-dispersible Mn:ZnSe/ZnO core/shell quantum dots with pure dopant emission
Source: Royal Society of Chemistry journal article supplement (doi:10.1039/c5nj01725d), 2015-01-01
Supplement: c5nj01725d2.pdf [file c5nj01725d2.pdf]

Table S1 Components ratios of OA-capped Mn:ZnSe, MPA-capped Mn:ZnSe and MPA-capped Mn:ZnSe/ZnO core/shell QDs measured by ICP-MS.

|                        | <b>Molar Ratios<br/>(Mn)</b> | <b>Molar<br/>Ratios(Zn)</b> |
|------------------------|------------------------------|-----------------------------|
| <b>Feed Ratio</b>      | <b>1</b>                     | <b>12.5</b>                 |
| <b>ICP-Mn:ZnSe</b>     | <b>1</b>                     | <b>14.1</b>                 |
| <b>ICP-Mn:ZnSe/ZnO</b> | <b>1</b>                     | <b>41.3</b>                 |
